# Supplementary material for: Vertical stratification of adult mosquitoes (Diptera: Culicidae) within a tropical rainforest in Sabah, Malaysia
Source: Springer Nature journal article supplement (doi:10.1186/s12936-016-1416-1), 2016-07-18

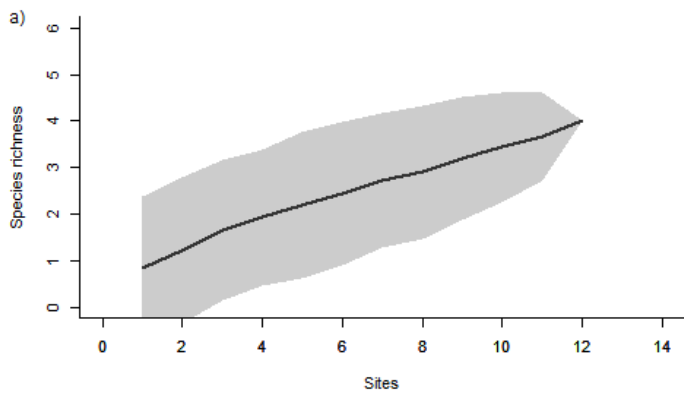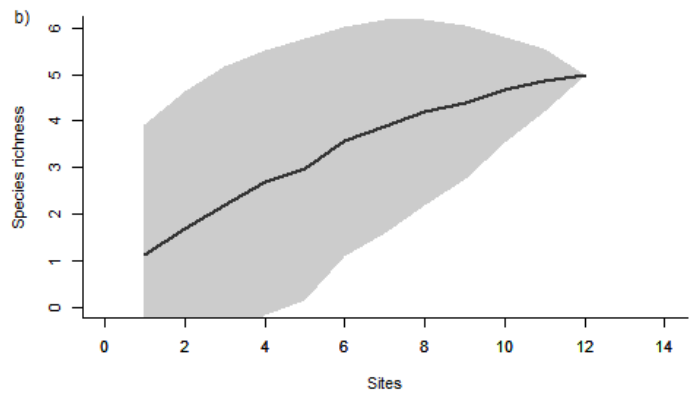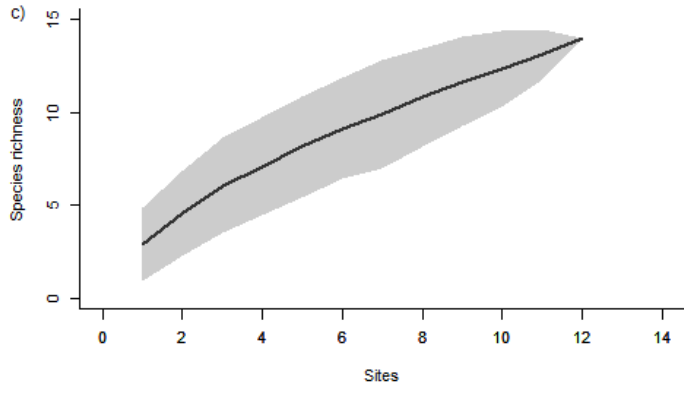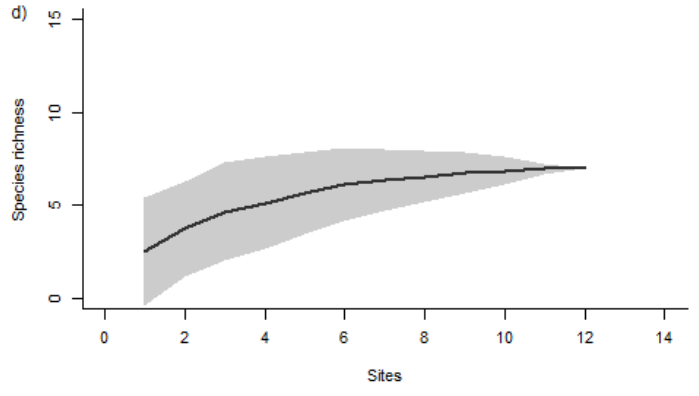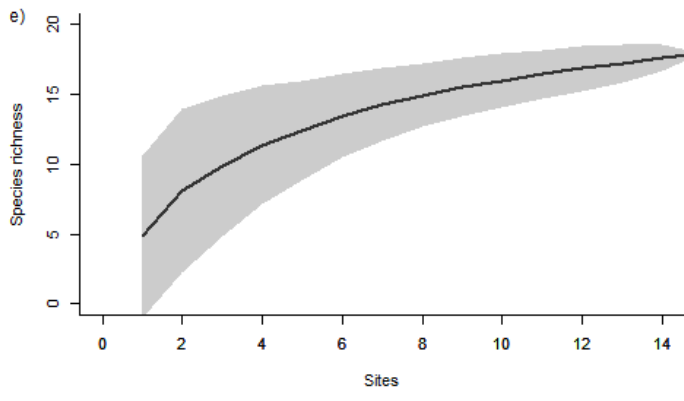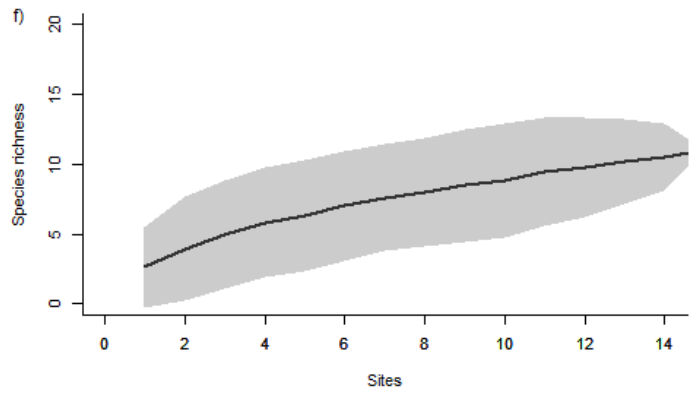

Supplement: MOESM1 [file 10502976]
